# Supplementary material for: Formyl azido substituted nitro hexaazaisowurtzitane – synthesis, characterization and energetic properties
Source: Royal Society of Chemistry journal article supplement (doi:10.1039/c3nj00532a), 2013-01-01
Supplement: c3nj00532a.pdf [file c3nj00532a.pdf]

**New Journal of Chemistry**

**Supporting Information**

**Formyl azido substituted nitro hexaazaisowurtzitane**

**– synthesis, characterization and energetic properties**

Kai Dong, Yuan Wang, Xu-Bin Gong, Jing Zhang, Cheng-Hui Sun<sup>\*a</sup>, and  
Si-Ping Pang<sup>\*a,b</sup>

School of Materials Science & Engineering, Beijing Institute of Technology, Beijing  
100081, P.R. China

State Key Laboratory of Explosion Science and Technology, Beijing Institute of  
Technology Beijing 100081, P.R. China

## Detailed computational information

### 1. Optimized structure of compound 6

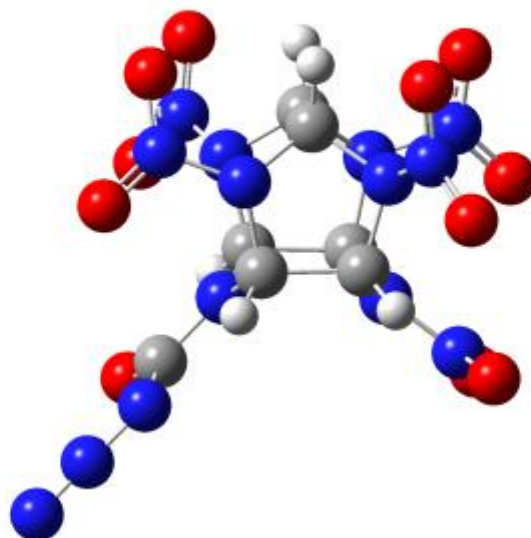

**Table S1.** Cartesian coordinates of the optimized structure of **6**

|   | X           | Y           | Z           |
|---|-------------|-------------|-------------|
| O | 2.45796300  | -2.03220700 | 2.45686000  |
| N | 2.35116100  | -0.82657200 | 2.31958900  |
| O | 2.83306200  | 0.04998400  | 3.01305900  |
| N | 1.63261700  | -0.38580300 | 1.14765500  |
| C | 0.98416700  | 0.91433600  | 1.27141700  |
| C | 0.62548500  | -1.33838200 | 0.61725500  |
| N | -0.35096500 | 0.49345700  | 0.49345700  |
| H | 1.47414500  | 1.52885800  | 2.01935600  |
| C | 0.97511100  | 1.63657300  | -0.15022400 |
| N | 0.73634500  | -1.46135100 | -0.81044100 |
| C | -0.78230800 | -0.68885300 | 0.95056600  |
| H | 0.77128800  | -2.31265100 | 1.07569100  |
| N | -1.28275000 | 1.45581300  | 2.09292200  |
| N | -0.39671100 | 1.73985800  | -0.62379500 |
| N | 1.55555900  | 0.81202900  | -1.21639500 |
| H | 1.44859700  | 2.61117700  | -0.09686600 |
| C | 0.61070500  | -0.25129700 | -1.59269700 |
| N | -1.48935000 | -0.36775700 | -0.27228200 |
| H | -1.40485700 | -1.33628000 | 1.56128900  |
| O | -0.83368300 | 2.57031100  | 2.33035300  |
| O | -2.44068200 | 1.07458200  | 2.19234400  |

|   |             |             |             |
|---|-------------|-------------|-------------|
| N | -0.69155100 | 2.90870000  | -1.41424600 |
| C | -0.76770100 | 0.43850800  | -1.22692600 |
| N | 2.92915300  | 0.56619300  | -1.20972900 |
| H | 0.69948400  | -0.50929000 | -2.64444600 |
| C | -2.80364600 | -0.71955000 | -0.56090200 |
| O | -0.03264100 | 3.90254100  | -1.16670900 |
| O | -1.61615700 | 2.80139200  | -2.19951200 |
| H | -1.40487600 | 0.60432500  | -2.09270500 |
| O | 3.60247700  | 1.32661700  | -0.52553700 |
| O | 3.31554100  | -0.35353400 | -1.91572000 |
| O | -3.37437100 | -0.38317600 | -1.57669300 |
| N | -3.34583100 | -1.54500400 | 0.45537600  |
| N | -4.54078200 | -1.85737400 | 0.26686700  |
| N | -5.61406400 | -2.20530000 | 0.20726500  |
| N | 1.32567100  | -2.62033900 | -1.37704600 |
| O | 1.61256300  | -3.51172100 | -0.59430700 |
| O | 1.43040900  | -2.62978900 | -2.59041700 |

## 2. Optimized structure of compound 7

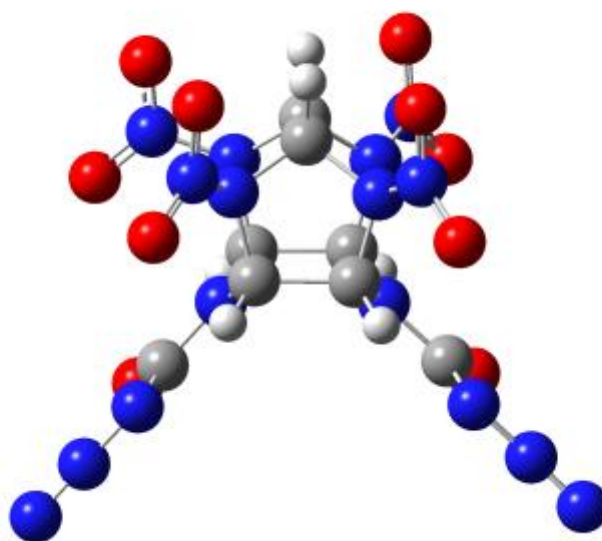

**Table S2.** Cartesian coordinates of the optimized structure of 7

|   | X          | Y           | Z           |
|---|------------|-------------|-------------|
| O | 2.67101100 | -2.72069500 | -0.78383800 |
| O | 3.16333300 | -0.85341600 | -1.83712700 |
| O | 2.10302300 | 2.29370500  | -2.13613600 |
| N | 1.03946500 | -1.35736100 | -1.41979100 |
| N | 2.39578500 | -1.65737200 | -1.32923800 |
| C | 1.87442800 | 2.01660600  | -0.97849000 |

|   |             |             |             |
|---|-------------|-------------|-------------|
| N | 1.09934500  | 0.93441000  | -0.58386000 |
| N | 2.32059500  | 2.75587600  | 0.14993600  |
| C | 0.59110800  | 0.03300600  | -1.59689200 |
| C | 0.76184400  | 0.59332800  | 0.77731000  |
| N | 3.03889200  | 3.73534300  | -0.13975600 |
| C | -0.97247800 | -0.14369300 | -1.44075500 |
| H | 0.88271100  | 0.42162200  | -2.56990700 |
| N | 1.28464900  | -0.74287400 | 1.12464500  |
| C | -0.81372600 | 0.44319000  | 0.92757100  |
| H | 1.17591800  | 1.33208900  | 1.45775600  |
| N | 3.6985390   | 4.64250300  | -0.27833900 |
| C | 0.08251300  | -2.08668700 | -0.58319600 |
| N | -1.16647300 | -1.58166400 | -1.13370700 |
| N | -1.45059200 | 0.67476500  | -0.34994200 |
| H | -1.52609400 | 0.11448700  | -2.34022100 |
| N | 2.07191200  | -0.85162400 | 2.31118100  |
| C | 0.19148500  | -1.70372700 | 0.96225200  |
| N | -0.99568900 | -0.95136300 | 1.36476000  |
| H | -1.22660700 | 1.11536900  | 1.67432100  |
| H | 0.16914000  | -3.15922800 | -0.72245800 |
| N | -1.75742000 | -2.37948700 | -2.16441200 |
| C | -2.56959400 | 1.46970200  | -0.55641100 |
| O | 2.15783500  | -1.96518000 | 2.79906100  |
| O | 2.62997500  | 0.17036200  | 2.67948900  |
| H | 0.33738600  | -2.58250700 | 1.58278300  |
| N | -1.51430500 | -1.18309800 | 2.66456800  |
| O | -1.53849300 | -3.57904700 | -2.10881400 |
| O | -2.47919000 | -1.79207800 | -2.95212200 |
| O | -3.12834300 | 1.57783300  | -1.62738700 |
| N | -2.93032700 | 2.15413800  | 0.63454800  |
| O | -1.31660700 | -2.29288300 | 3.13370500  |
| O | -2.16319700 | -0.27159000 | 3.15760500  |
| N | -3.93855100 | 2.88136100  | 0.51432500  |
| N | -4.83592800 | 3.56812400  | 0.52849900  |

---

### 3. Detonation performances

#### Heat of formation

Isodesmic reaction, in which numbers of electron pairs and chemical bond types are conserved, has been employed very successfully to give heats of formation more accurate than semi-empirical calculation.

For the following isodesmic reactions, heat of formation ( $\Delta H_{298K}$ ) can be calculated according to the following equation:

$$\Delta H_{298K} = \sum \Delta H_{f,P} - \sum \Delta H_{f,R}$$

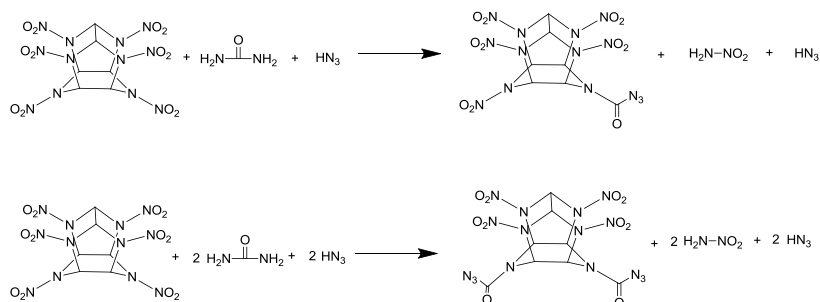

Where  $\Delta H_{f,R}$  and  $\Delta H_{f,P}$  are the heat of formation for reactants and products at 298.15K, respectively. Meanwhile,  $\Delta H_{298K}$  can be also obtained from the following expression:

$$\Delta H_{298K} = \Delta E_{298K} - \Delta(PV) = \Delta E_0 + \Delta ZPE + \Delta H_T + \Delta(nRT)$$

Where  $\Delta E_0$  is the change in total energy between the products and the reactants at 0 K;  $\Delta ZPE$  is the difference between the zero-point energies of the products and the reactants;  $\Delta H_T$  is thermal correction from 0K to 298.15K. Consequently, the heat of formation can be worked out by using  $\Delta H_{298K}$  and heat of formation of other reactants and products. The data in needed can be obtained from literatures and handbooks.

**Table S3.** Calculated total energy ( $E_0$ ), zero-point energy (ZPE) and thermal correction ( $H_T$ )

|          | $E_0/\text{a.u.}$ | ZPE/(kJ/mol) | $H_T/\text{(kJ/mol)}$ |
|----------|-------------------|--------------|-----------------------|
| <b>6</b> | -1863.64812571    | 610.8698     | 68.06083              |
| <b>7</b> | -1936.10841755    | 639.2042     | 73.61901              |
| <b>2</b> | -2014.69841499    | 788.4612     | 81.12532              |
| <b>3</b> | -2093.32821805    | 936.7468     | 88.66575              |

Detonation performances of the related compounds were calculated using Kamlet-Jacobos (K-J) equations as follows.

$$D = 1.01 \left( \text{NM}^{1/2} \text{Q}^{1/2} \right)^{1/2} (1 + 1.3\rho)$$

$$P = 1.558 \rho^2 \text{NM}^{1/2} \text{Q}^{1/2}$$

where D represents detonation velocity ( $\text{km}\cdot\text{s}^{-1}$ ), P is detonation pressure (GPa); N, moles of detonation gases per gram of explosive; M, average molecular weight of these gases; Q, chemical energy of detonation ( $\text{kJ}\cdot\text{g}^{-1}$ );  $\rho$ , density of explosive ( $\text{g}\cdot\text{cm}^{-3}$ ).

Table S4 shows the methods for calculating parameters of the explosive in CaHbOcNd form. All the nitrogen atoms are converted into  $\text{N}_2$ , the oxygen atoms are considered to form  $\text{H}_2\text{O}$  first and then  $\text{CO}_2$  with carbon atoms. The remaining carbon atoms will exist in solid state. If there is any oxygen atom left, they will form  $\text{O}_2$ .

**Table S4.** Methods for parameters calculation in K-J equations

|                   | $C \geq 2a+b/2$                                | $2a+b/2 > c \geq b/2$                             | $b/2 > c$                         |
|-------------------|------------------------------------------------|---------------------------------------------------|-----------------------------------|
| N                 | $(b+2c+2d)/4M^{[a]}$                           | $(b+2c+2d)/4M'$                                   | $(b+d)/2M'$                       |
| M                 | $4 M'/(b+2c+2d)$                               | $(56d+88c-8b)/(b+2c+2d)$                          | $(2b+28d+32c)/(b+d)$              |
| $Q \cdot 10^{-3}$ | $(28.9b+94.05a+0.239\Delta H_f^\circ)/M^{[b]}$ | $[28.9b+94.05(c/2-b/4)+0.239\Delta H_f^\circ]/M'$ | $(57.8c+0.23\Delta H_f^\circ)/M'$ |

[a]  $M'$  is molecular weight of explosive. [b]  $\Delta H_f^\circ$  is heat of formation of explosive

## Sensitivity

The impact sensitivity was tested on a type 12 tooling according to “up” and “down” method. A 5.0kg weight was dropped from a set height onto a 30mg sample placed on 150 grit garnet sandpaper. Each subsequent test was made at the next lower height if explosion occurred and at the next higher height if no explosion happened. 50 drops were made from different heights, and an explosion or non-explosion was recorded to determine the results. It is worth noting that in the early stage of testing the impact sensitivity, the experimental result (Compound **6** and **7**, both above 20J) just as presented in the latest “New Trends in Research of Energetic Materials” (NTREM) conference in Czech, was much higher than the current values (Compound **6**, 6J; Compound **7**, 11J), which could be attributed to the malfunction of the sensitivity testing machine before.

## Spectrometric Data

### Compound 9

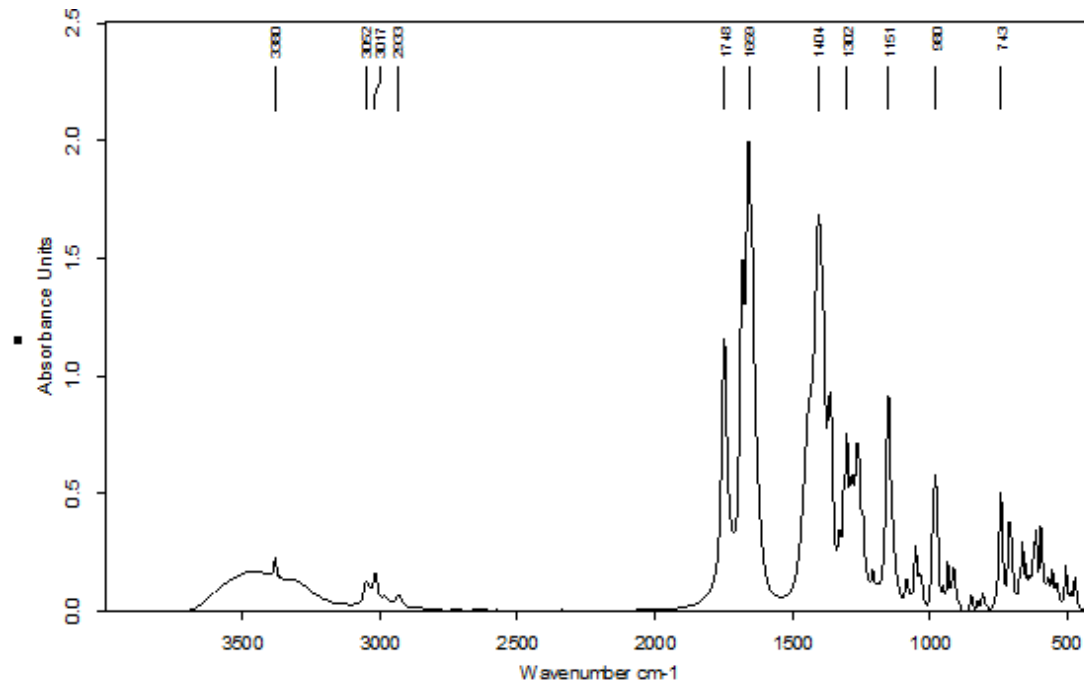

Figure S1. IR spectrum

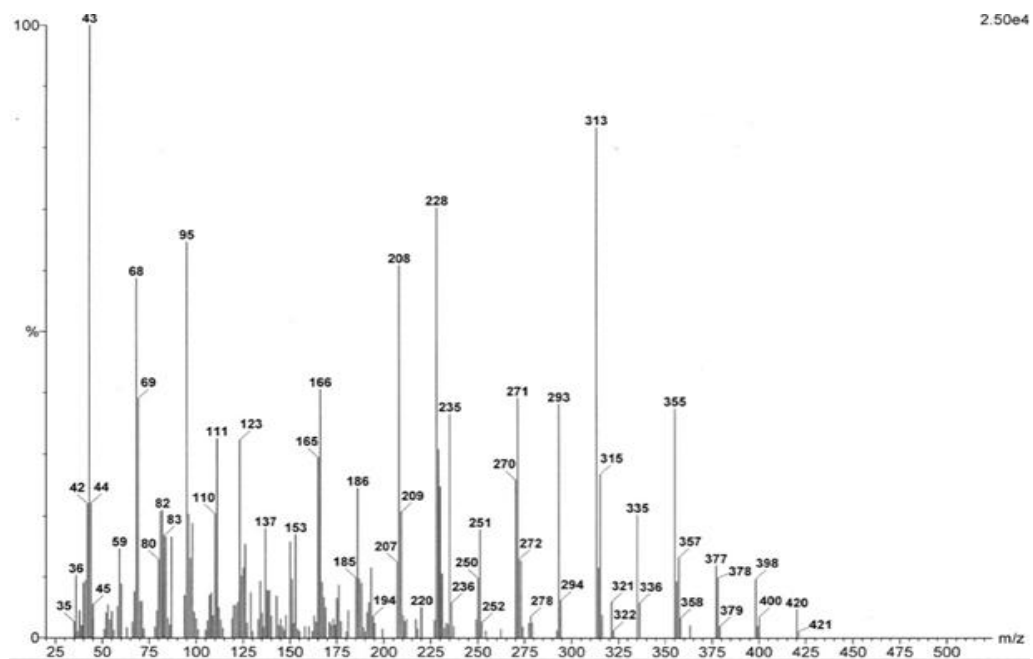

### Compound 10

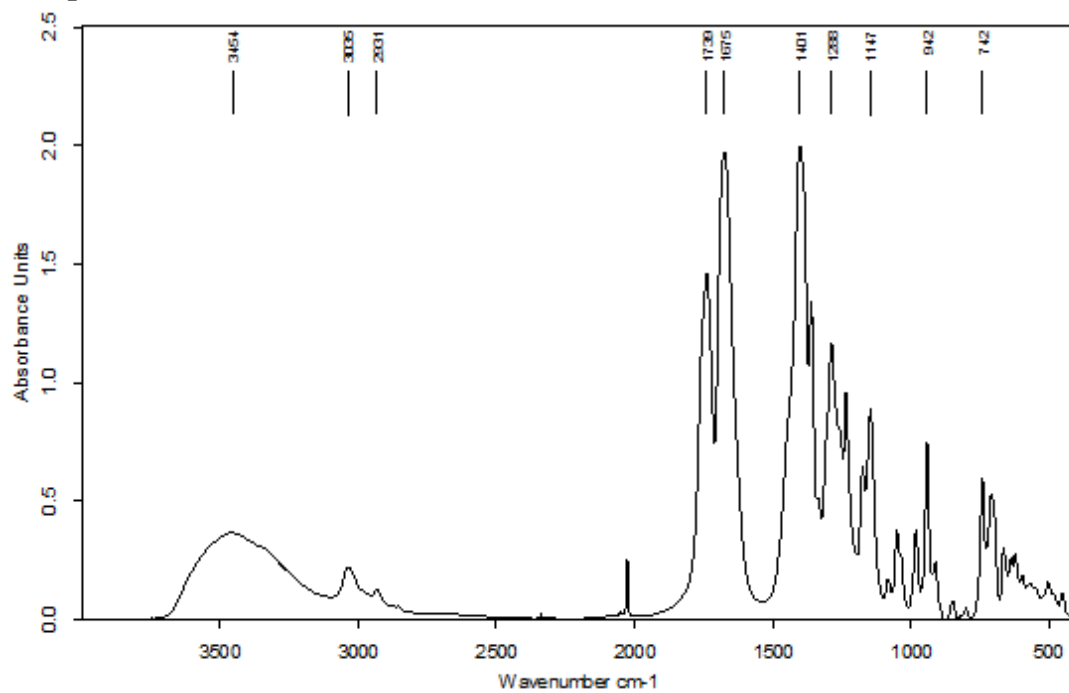

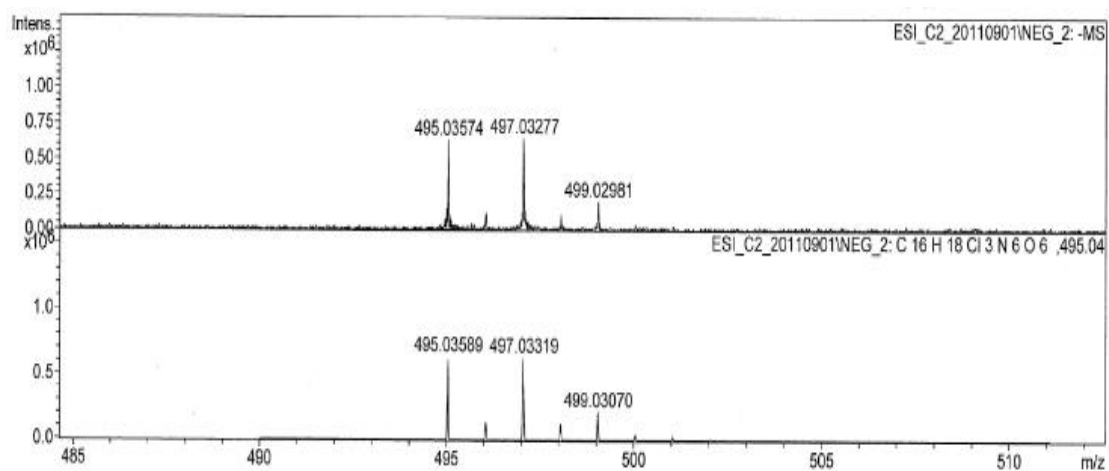

Figure S4. ESI-MS spectrum

### Compound 6

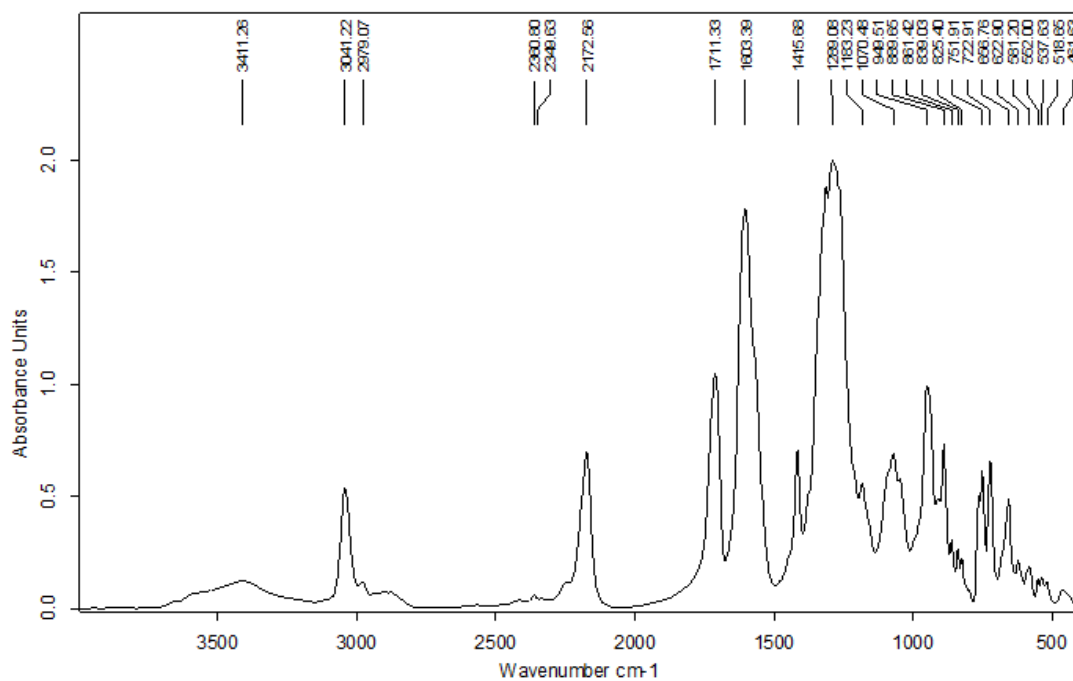

Figure S5. IR spectrum



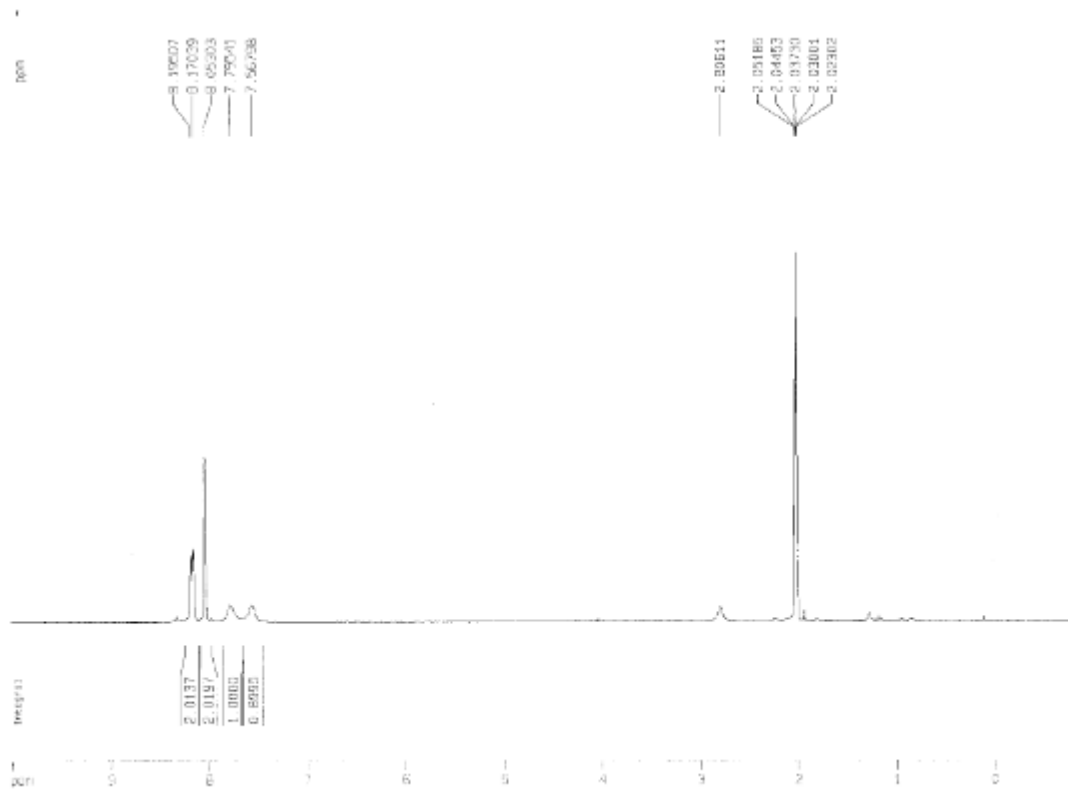

Figure S6. <sup>1</sup>H NMR spectrum

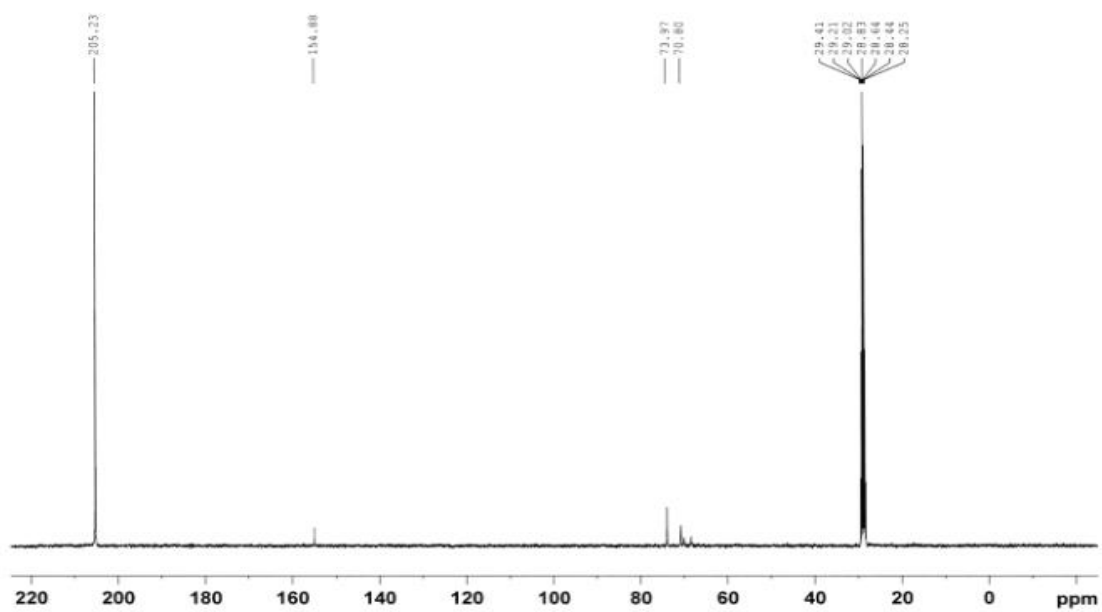

Figure S7. <sup>13</sup>C NMR spectrum

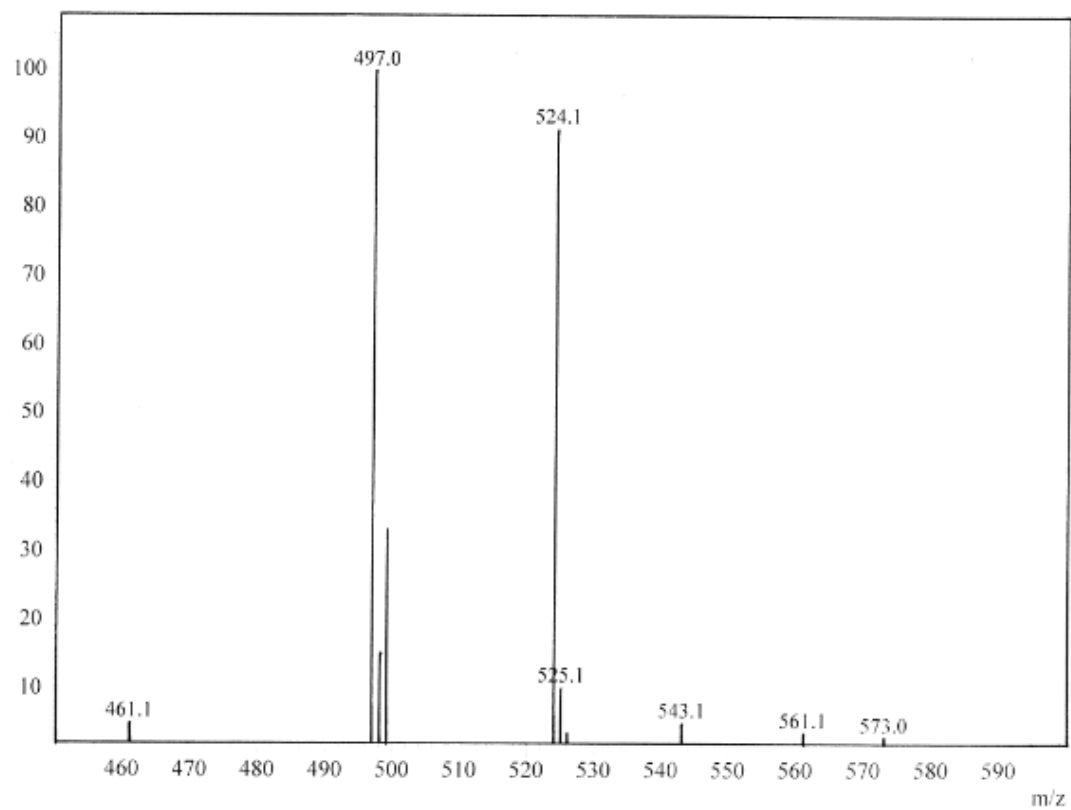

**Figure S8.** ESI-MS spectrum

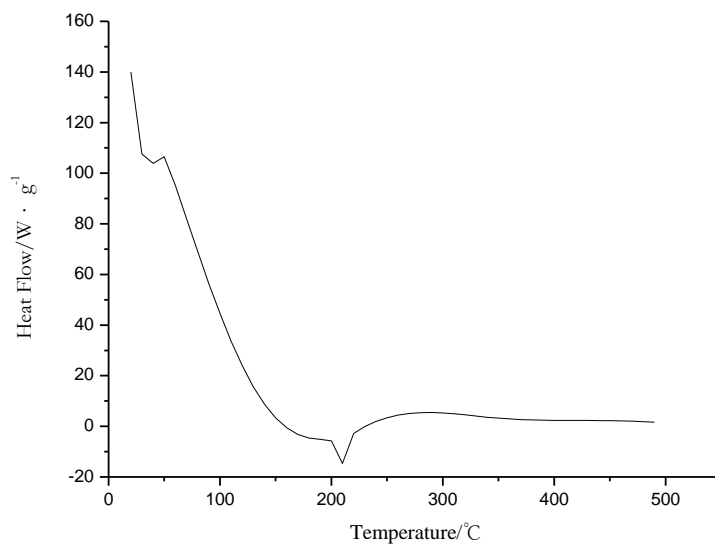

**Figure S9.** DSC curve

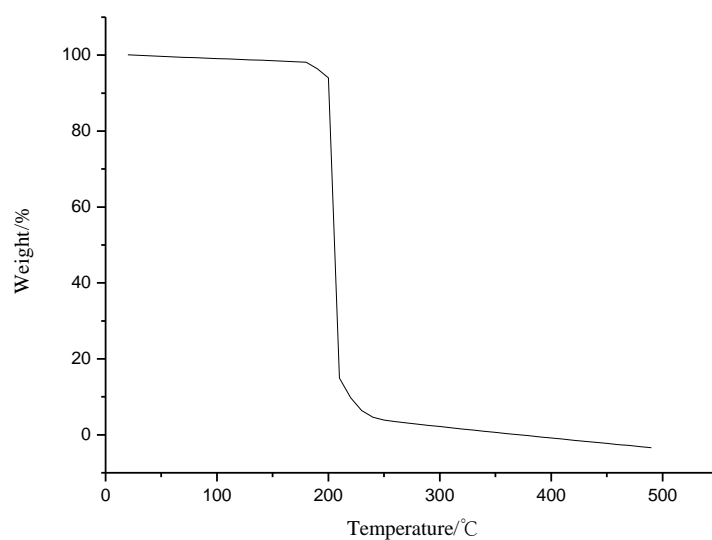

**Figure S10.** TGA curve

### Compound 7

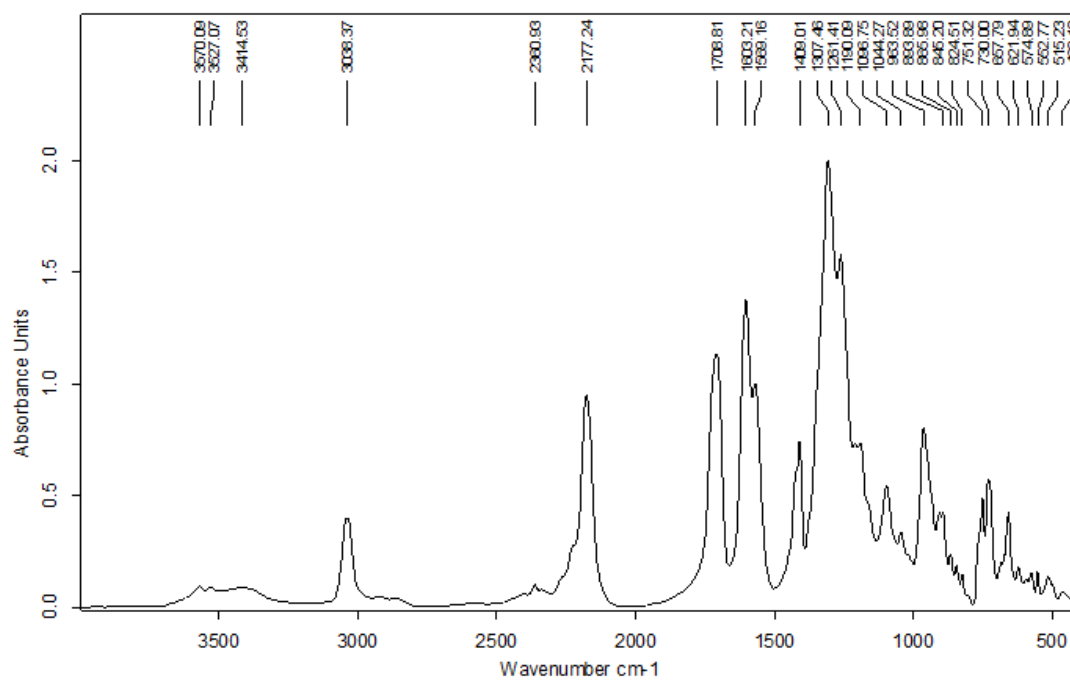

**Figure S11.** IR spectrum

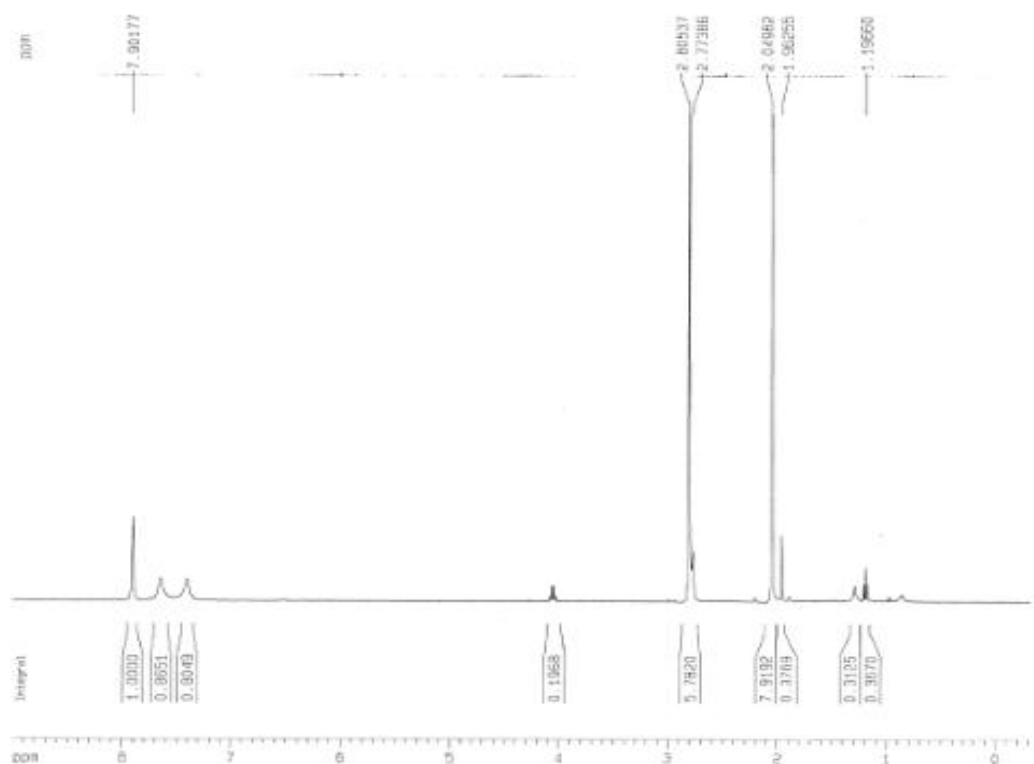

Figure S12. <sup>1</sup>H NMR spectrum

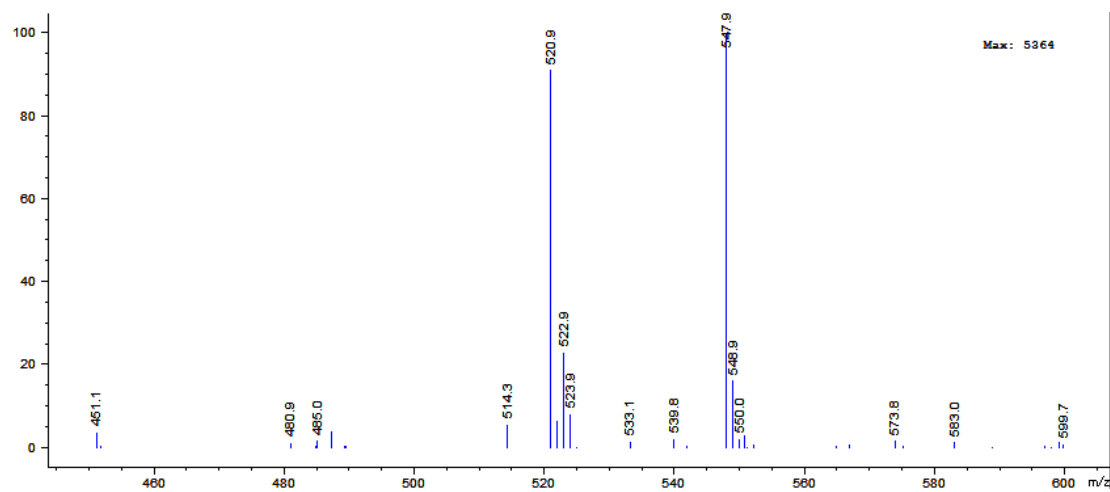

Figure S13. ESI-MS spectrum

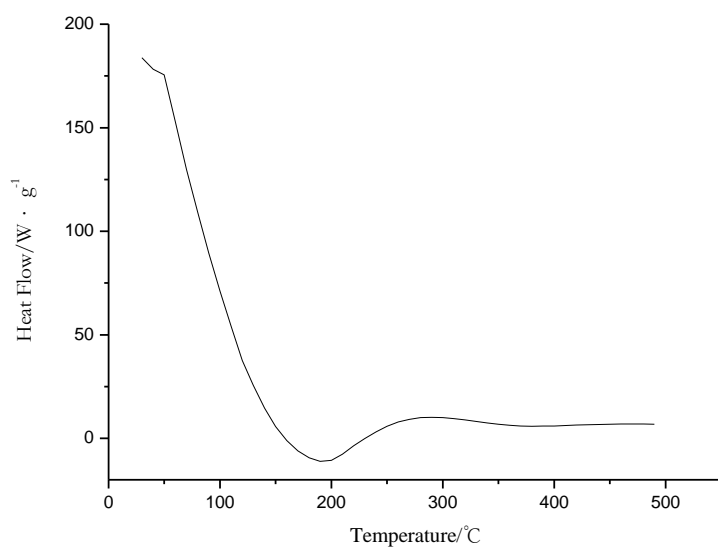

**Figure S14.** DSC curve

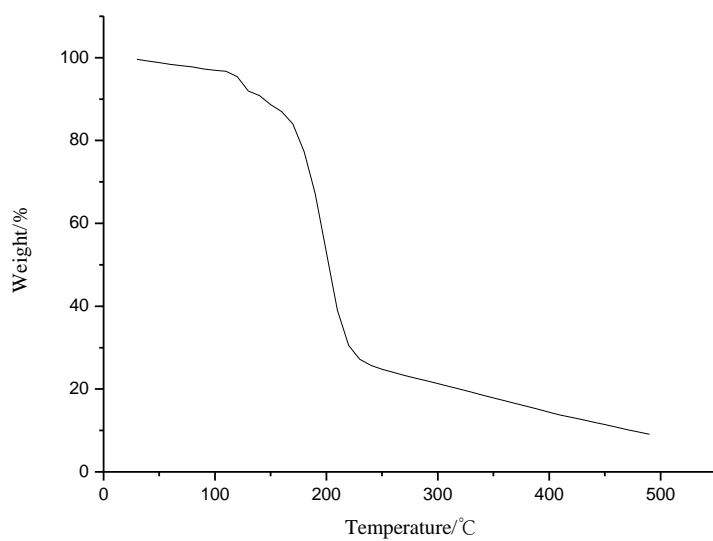

**Figure S15.** TGA curve

**Compound 13**

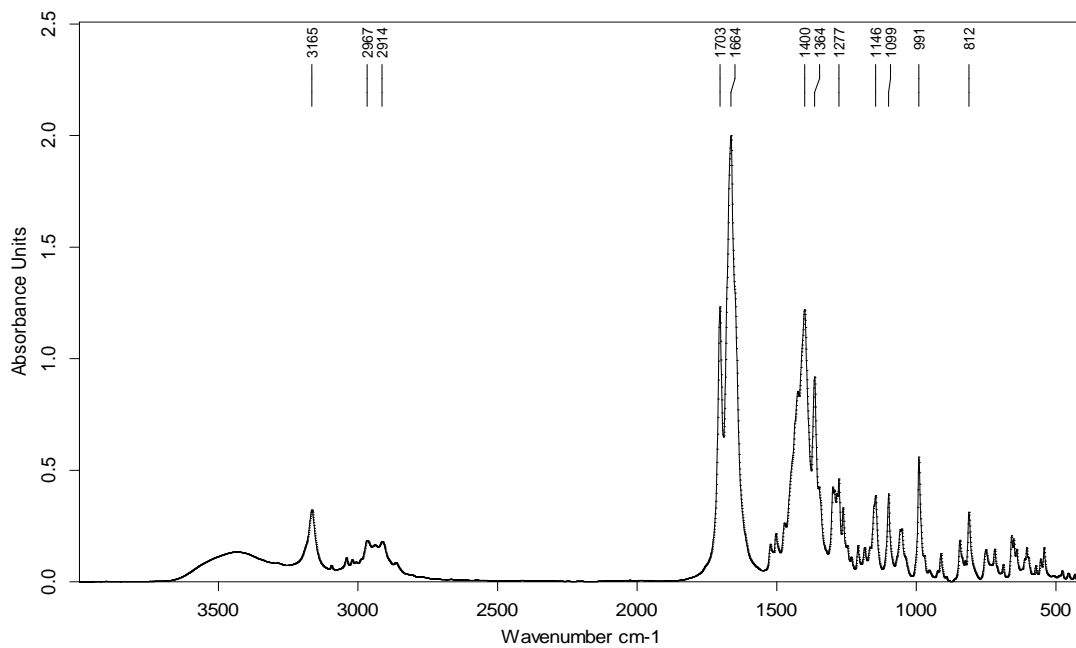

**Figure S16.** IR spectrum

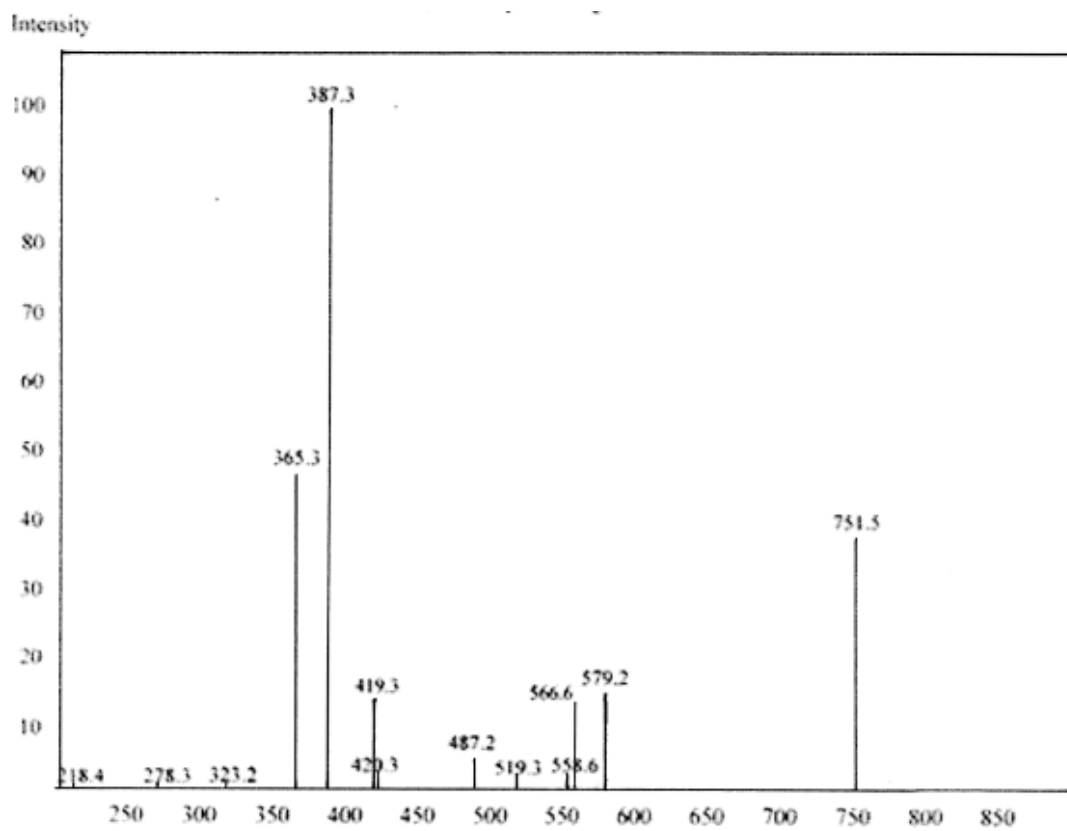

**Figure S17.** ESI-MS spectrum
